# Supplementary material
Source: Frontiers journal article supplement (https://www.frontiersin.org/articles/387223)
Supplement: Image_1.pdf [file Image_1.pdf]

Supplementary File

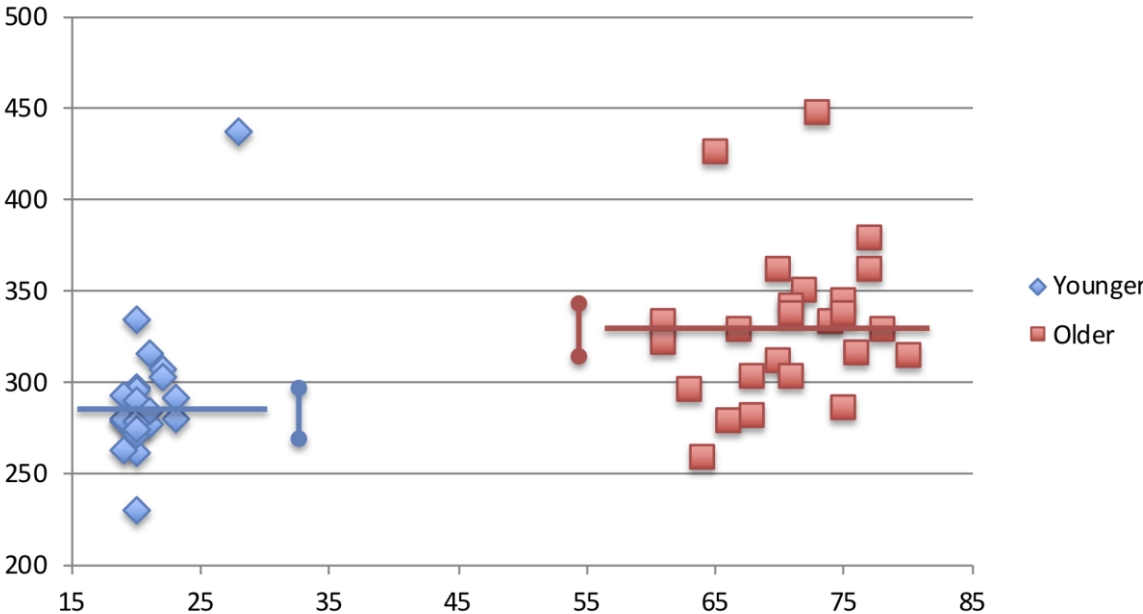

Supplementary Figure 1. Mean RTs on the X-test for each participant. Average RTs are indicated with horizontal lines. Vertical lines indicate group means plus or minus one standard error.
